# Supplementary material for: Porosity generated during the fluid-mediated replacement of calcite by fluorite
Source: Royal Society of Chemistry journal article supplement (doi:10.1039/c6ce01150k), 2016-01-01
Supplement: c6ce01150k1.pdf [file c6ce01150k1.pdf]

## Supporting Information

### Annex A – Calcite single crystals purity

**Table A1.** Resume of ICP-OES measurements.

| Element           | Concentration (ppm) | %     |
|-------------------|---------------------|-------|
| CaCO <sub>3</sub> | -                   | 99.97 |
| Fe                | 0.05                | 0.00  |
| Mg                | 5.15                | 0.02  |
| Mn                | 0.48                | 0.00  |
| Sr                | 2.16                | 0.01  |
| Zn                | 0.71                | 0.00  |

### Annex B - Relevant plots

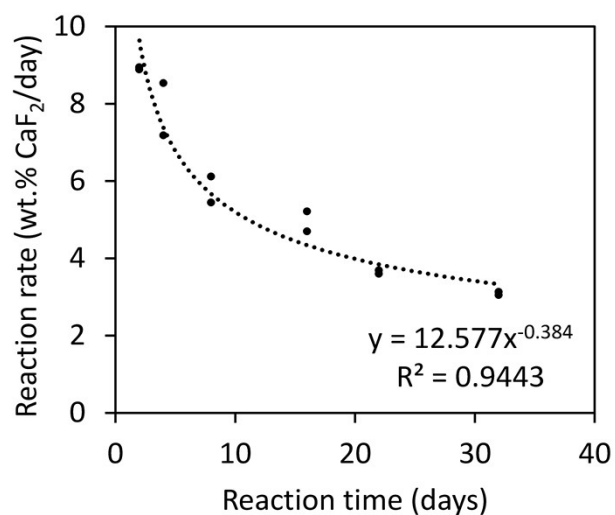

**Figure B1.** Power-law reaction rate decrease of the replacement of calcite by fluorite in function of time.

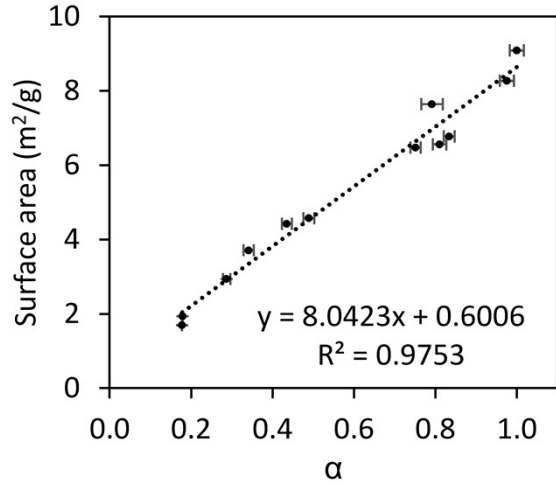

Figure B2. Linear correlation between the surface area and the fraction of fluorite ( $\alpha$ ) in the samples.

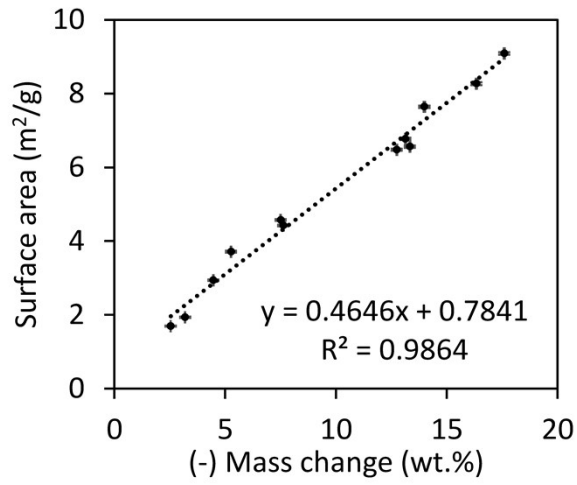

Figure B3. Linear correlation between the surface area and the samples mass change.

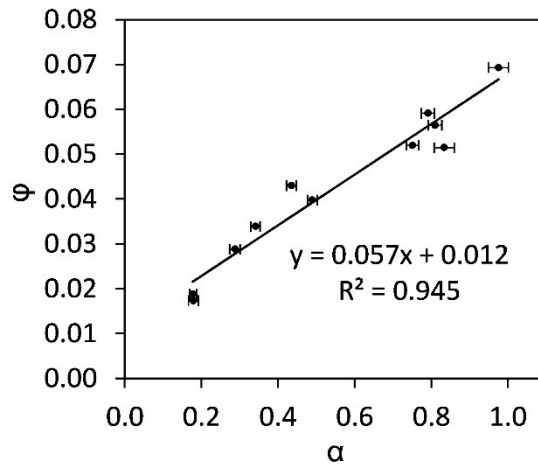

**Figure B4.** Linear correlation between the calculated open porosity ( $\phi$ ) from the N<sub>2</sub> adsorption measurements and the fraction of fluorite in the samples ( $\alpha$ ).

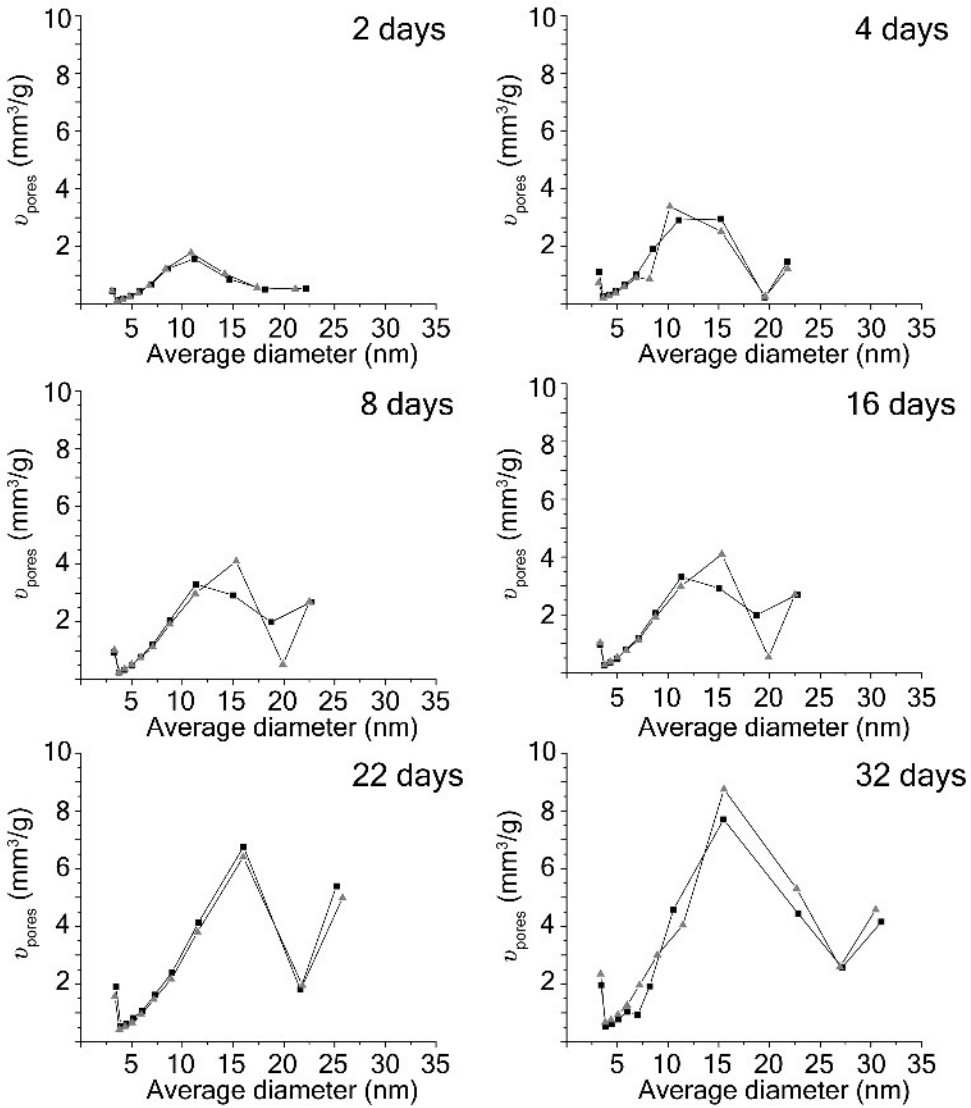

**Figure B4.** Pore size distributions.

Annex C - Image segmentation (IS)

IS-1

Secondary electron (SE) image:

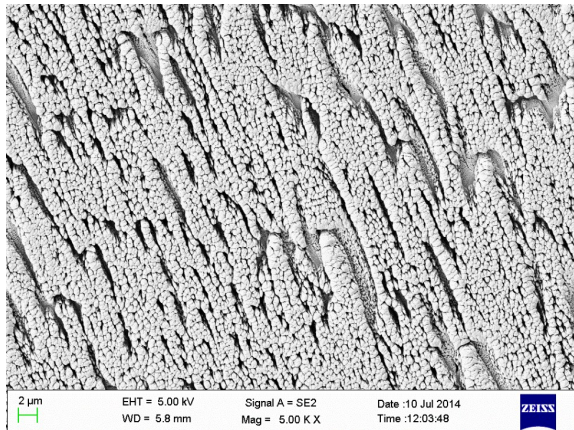

Mask 1:

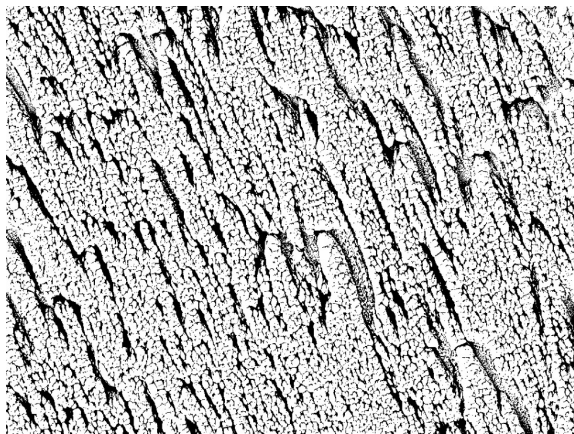

Mask 2:

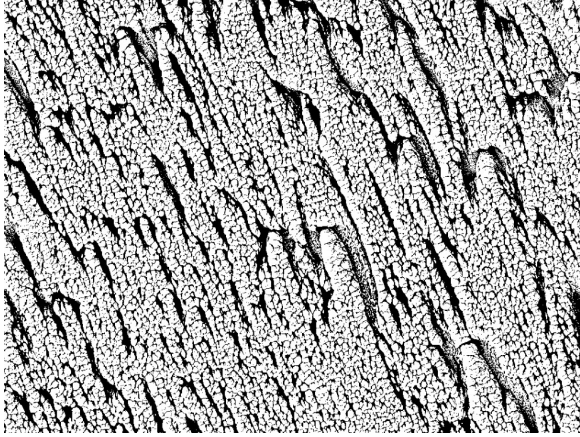

IS-2

SE:

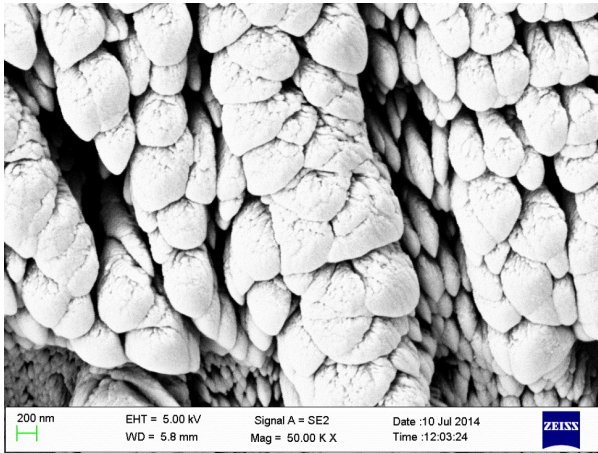

Mask 1:

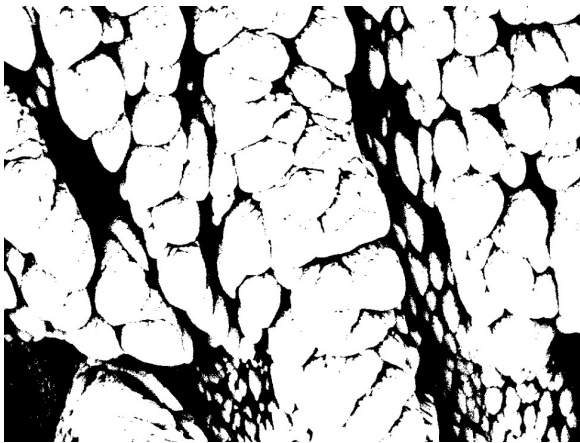

Mask 2:

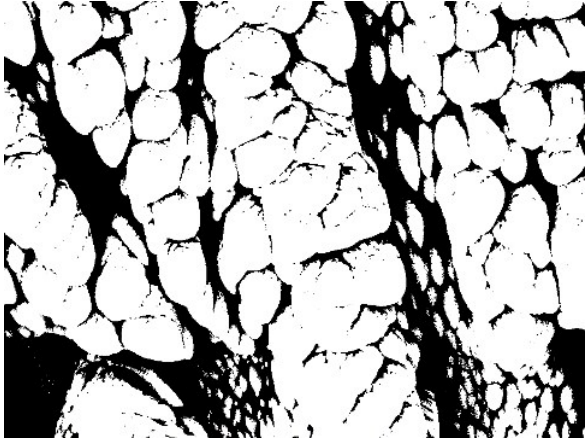

IS-3

SE

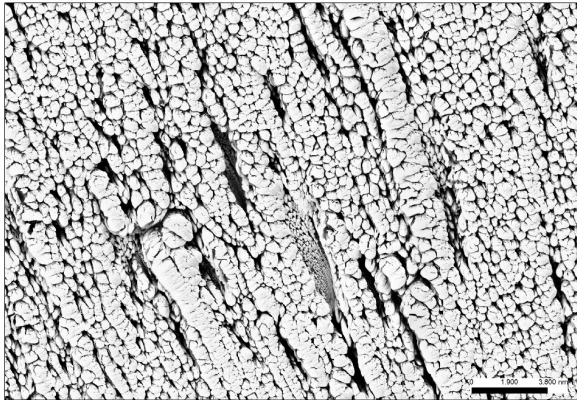

Mask 1

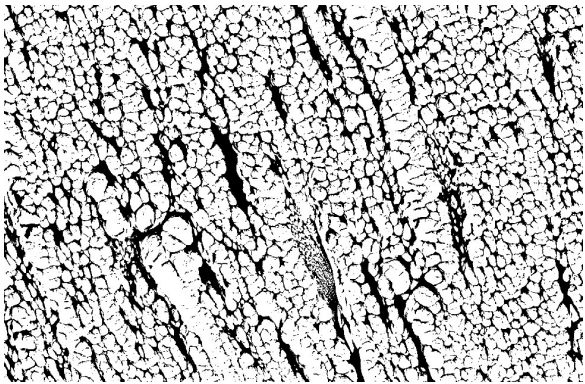

Mask 2

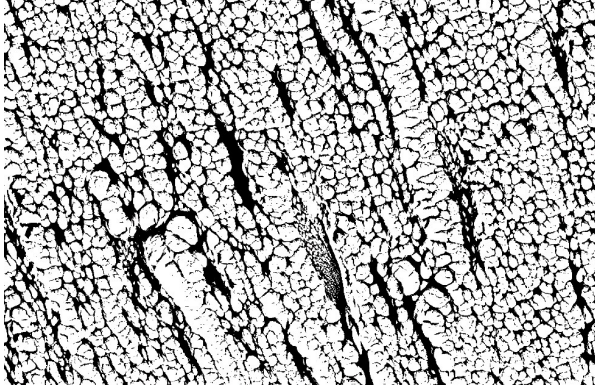

IS-4

SE

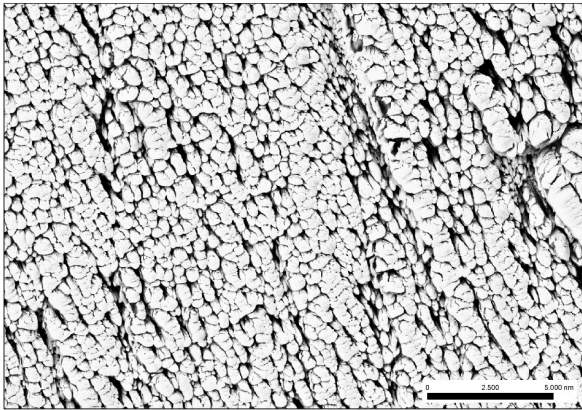

Mask 1

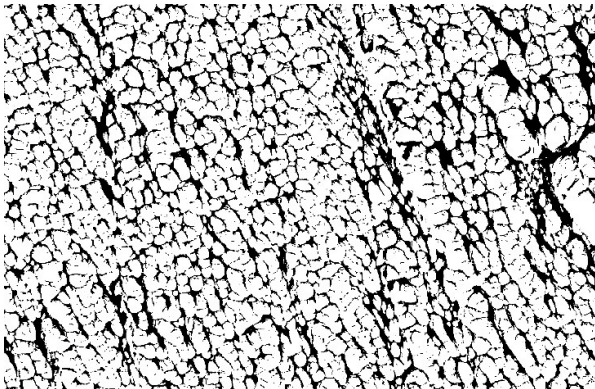

Mask 2

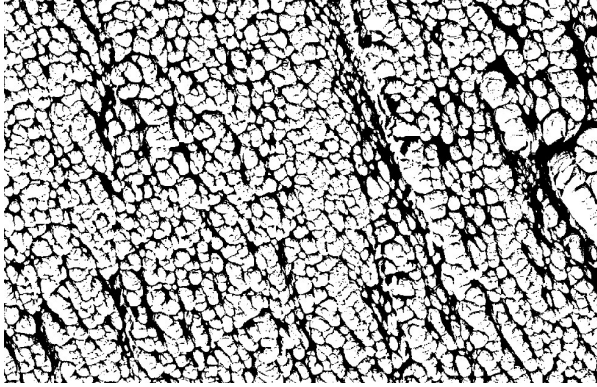

IS-5

SE:

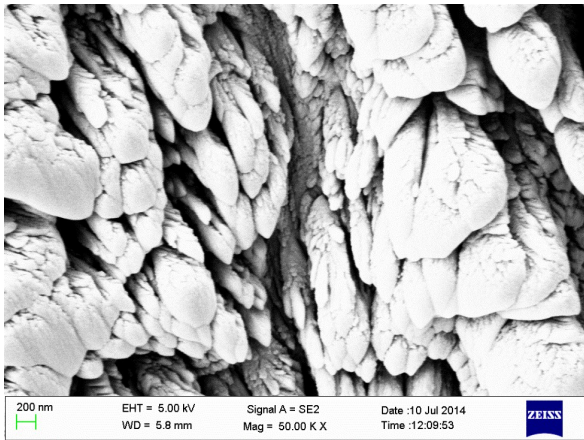

Mask 1:

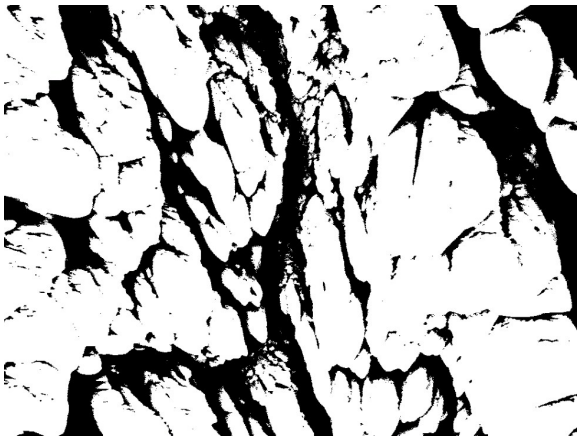



Mask 2:

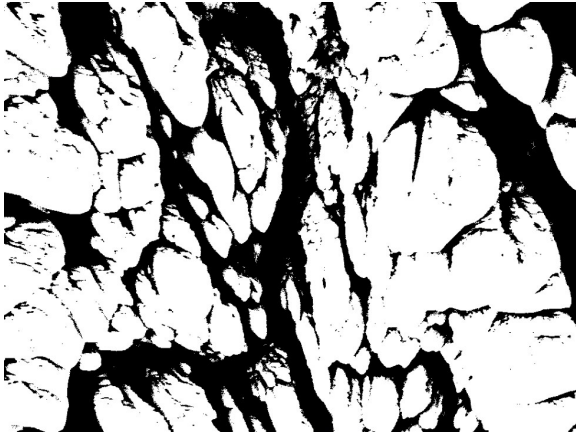

SI-6

SE:

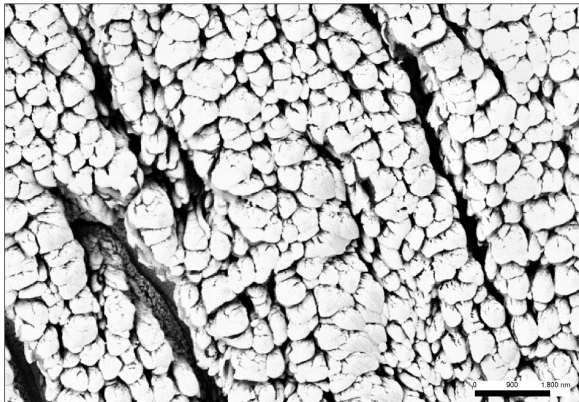

Mask 1:

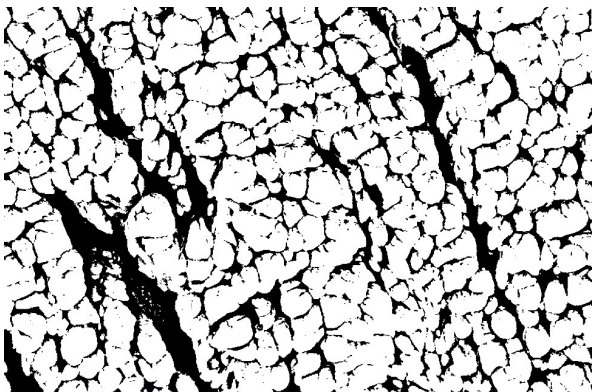

Mask 2:

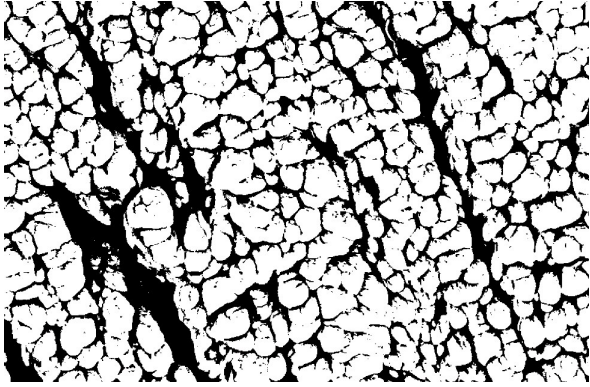

IS-7

SE:

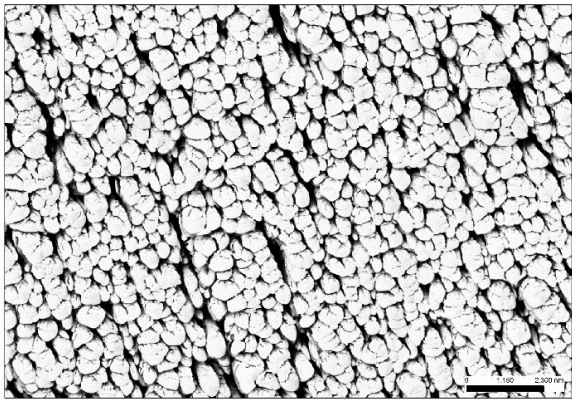

Mask 1:

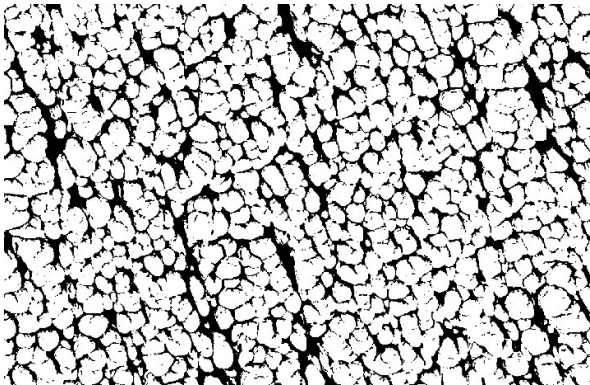

Mask 2:

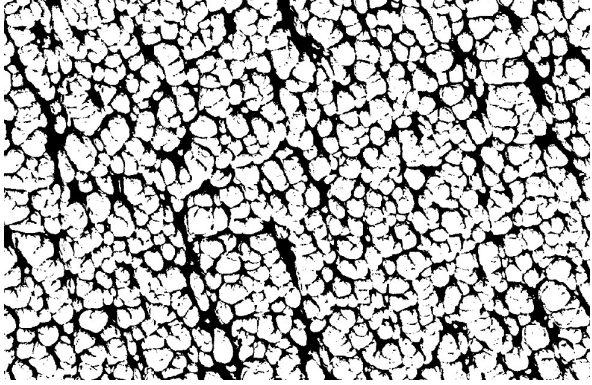

SI-8

SE:

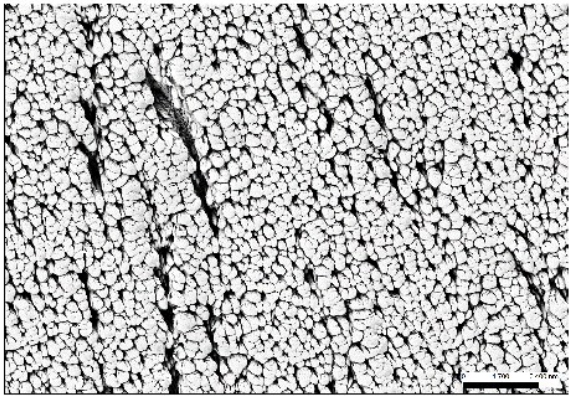

Mask 1:

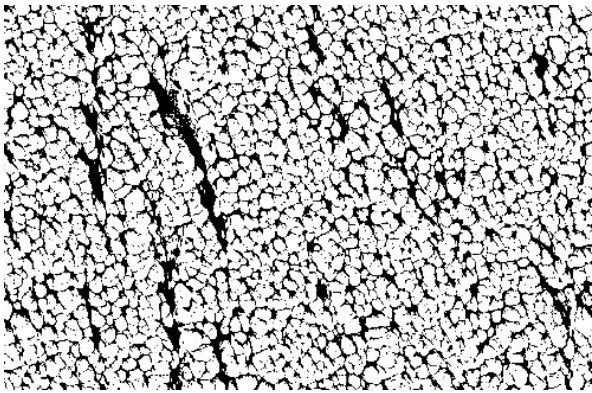

Mask 2:

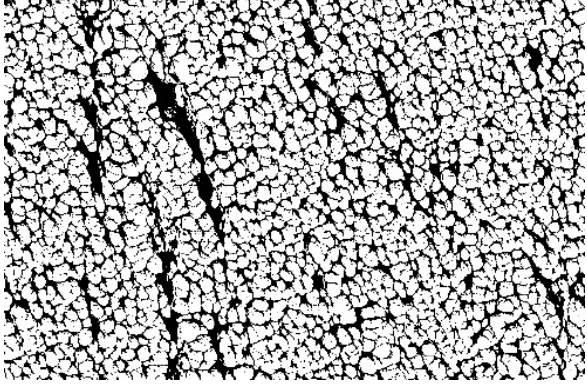

SI-9

SE:

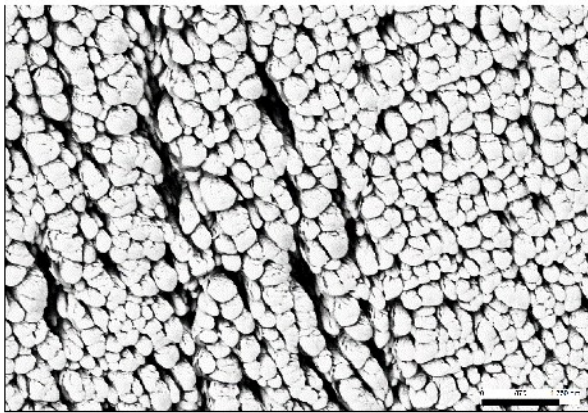

Mask 1:

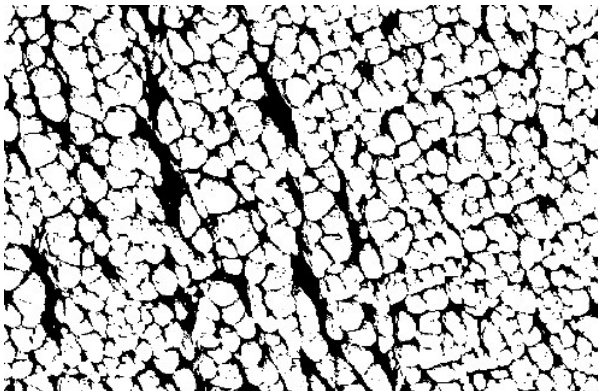

Mask 2:

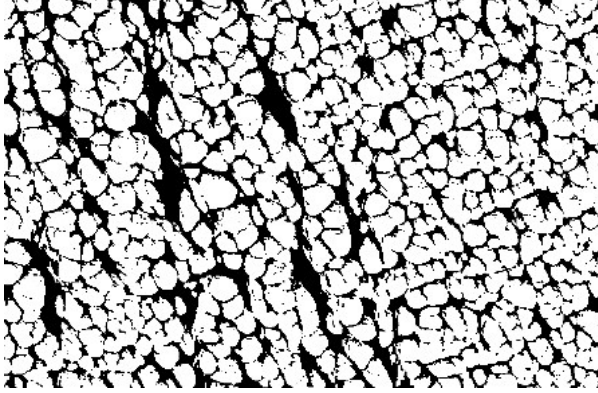

SI-10

SE:

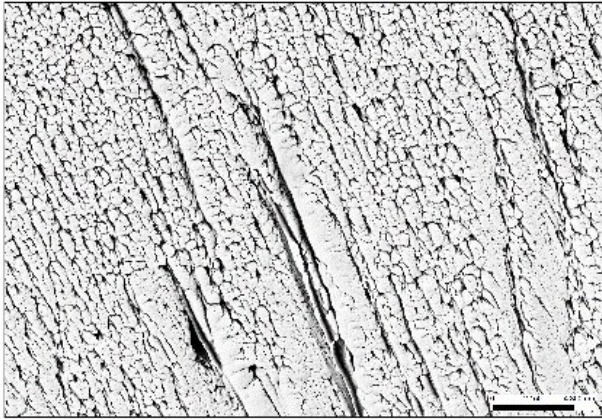

Mask 1:

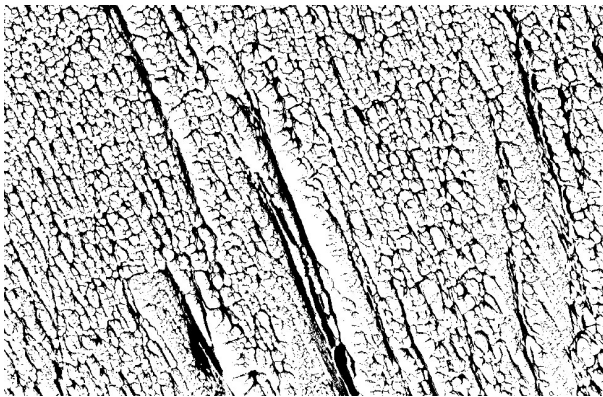

Mask 2:

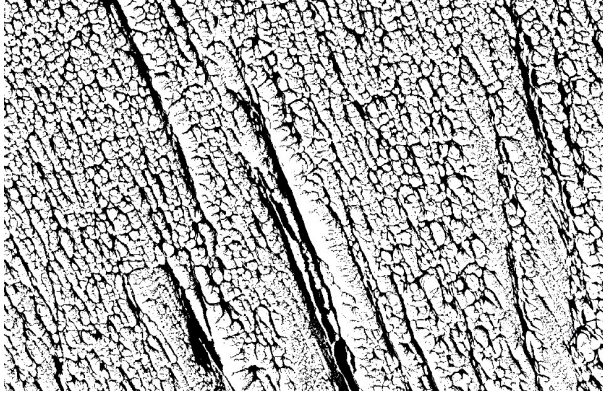

SI-11

SE:

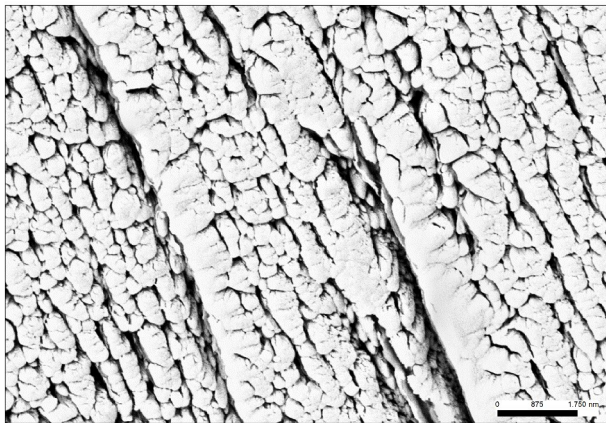

Mask 1:

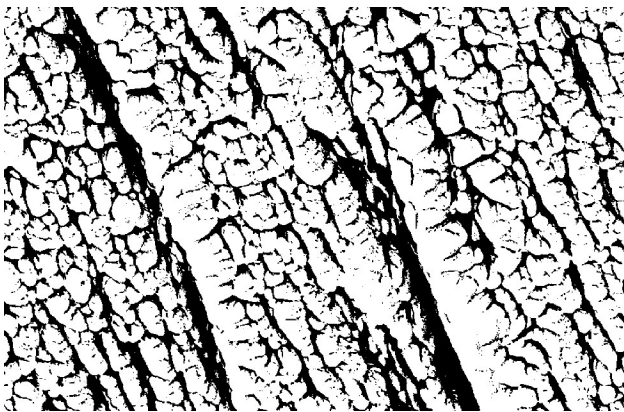

Mask 2:

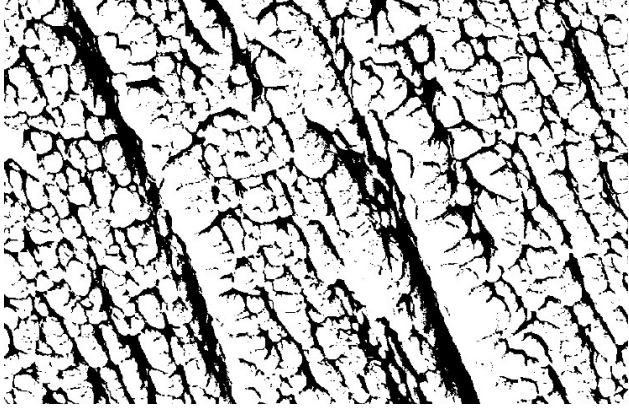

IS-12

SE

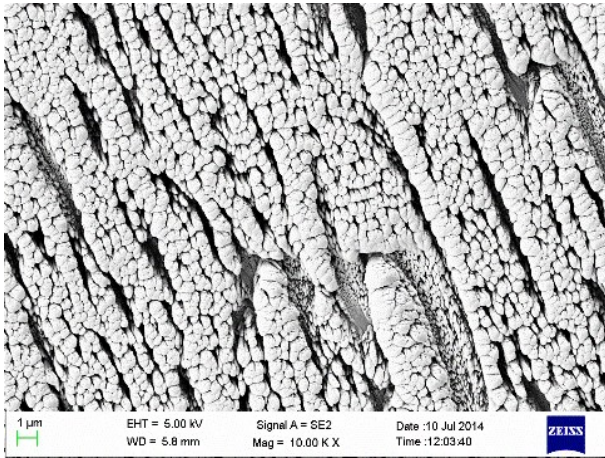

Mask 1:

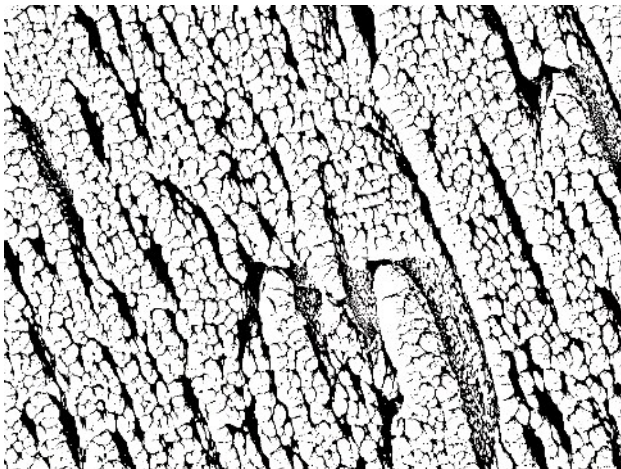

Mask 2:

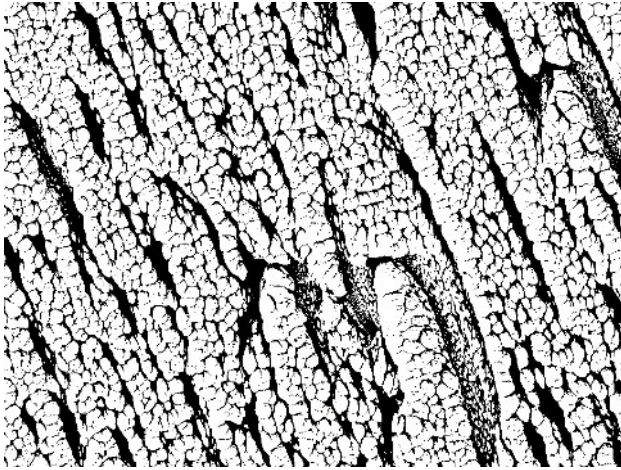

IS-13

SE

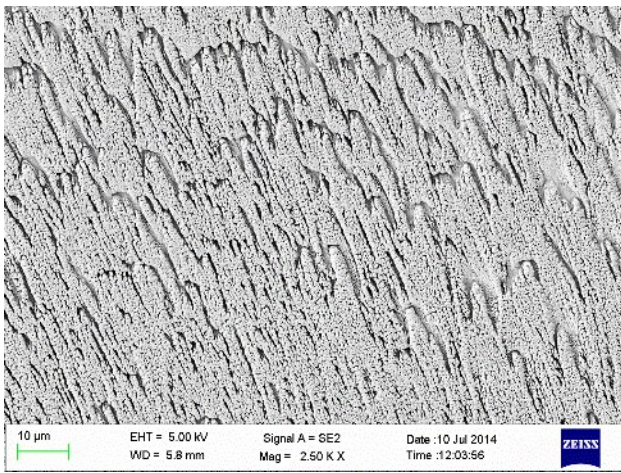

Mask 1:

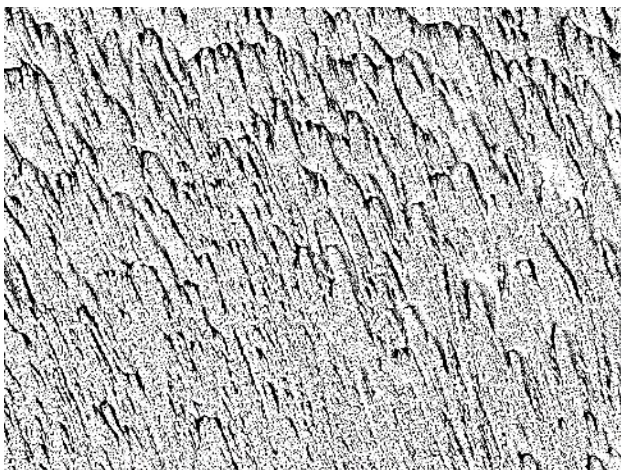

Mask 2:



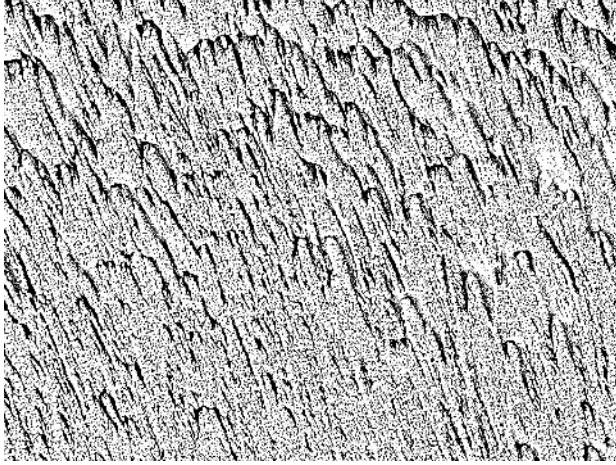

IS-14

SE:

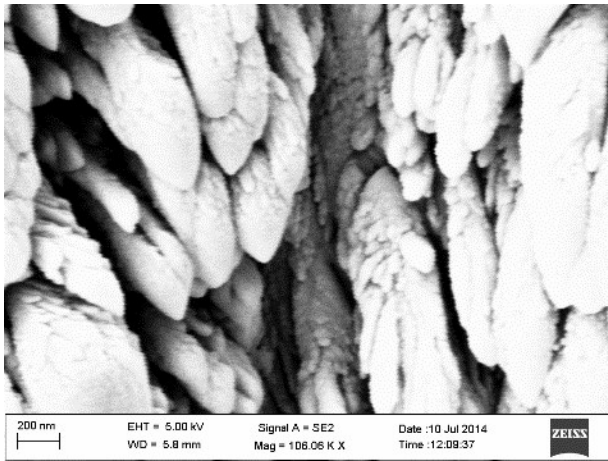

Mask 1:

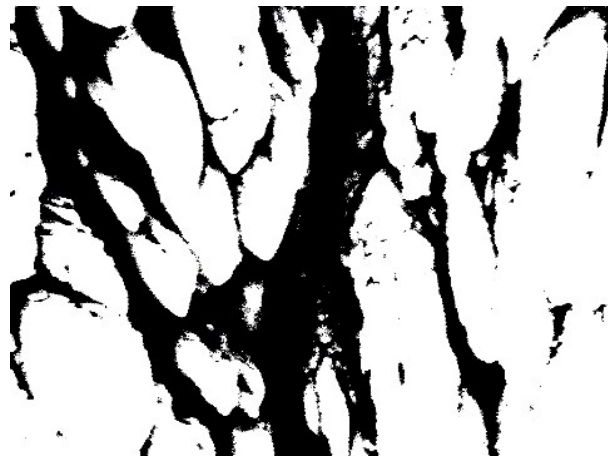

Mask 2:

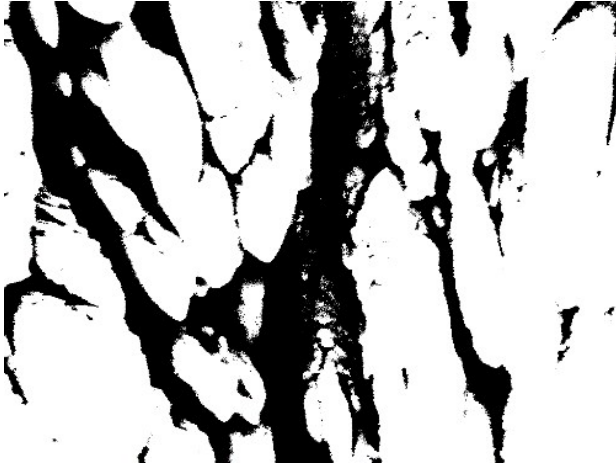

IS-15

SE:

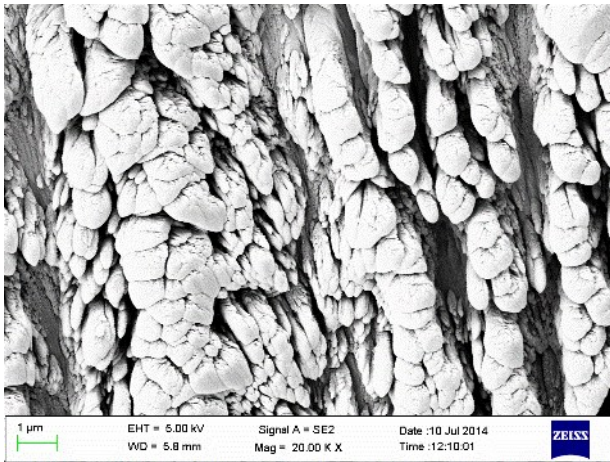

Mask 1:

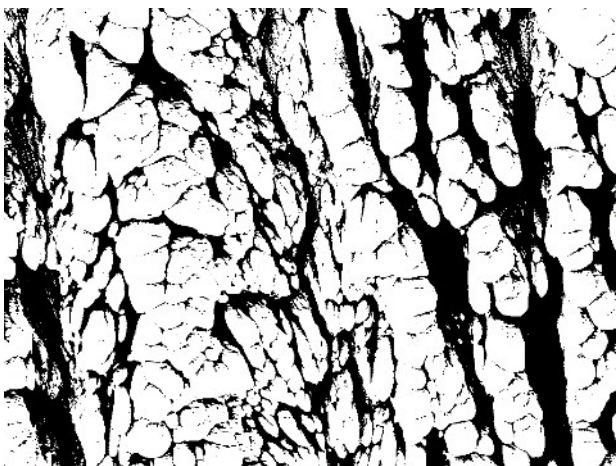

Mask 2:

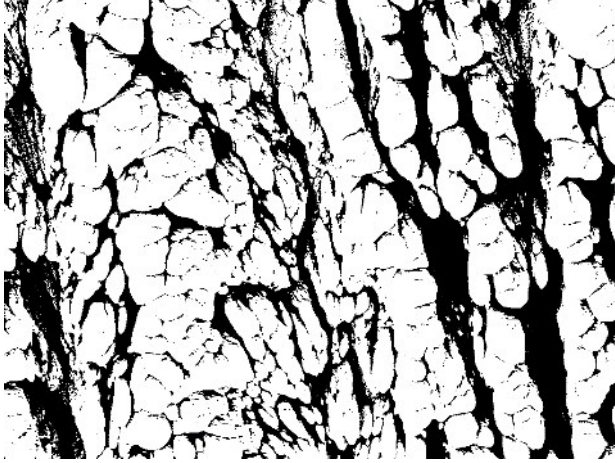

IS-16

SE:

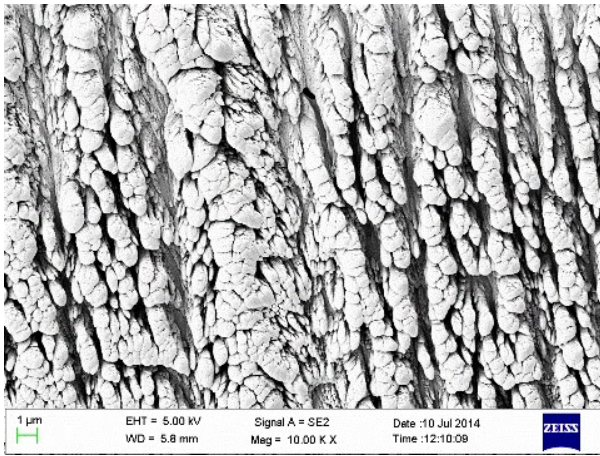

Mask 1:

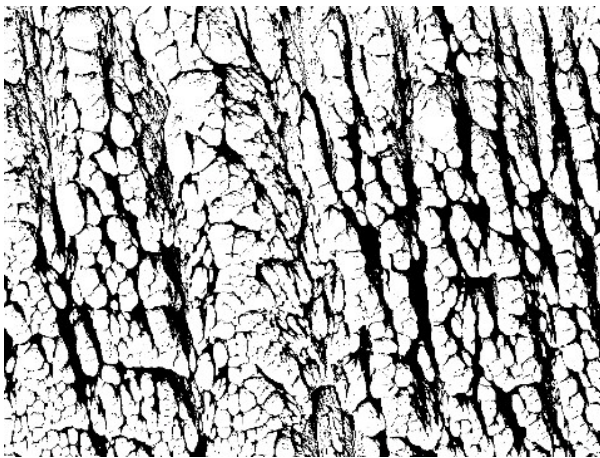

Mask 1:

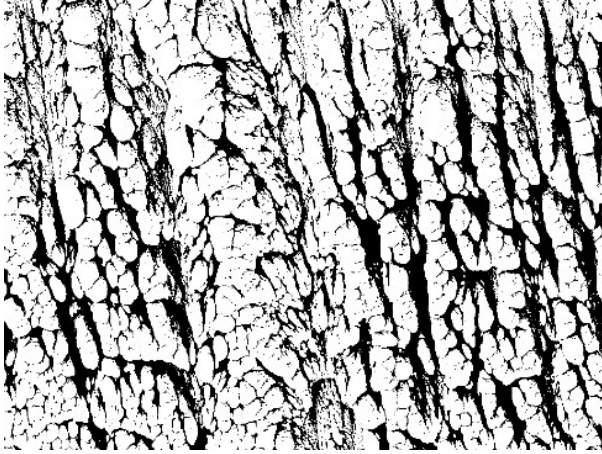

Table B1. Background (black areas) percentages in each mask.

| Code  | Mask | Background (%) |
|-------|------|----------------|
| IS-1  | 1    | 27.07          |
|       | 2    | 33.39          |
| IS-2  | 1    | 27.08          |
|       | 2    | 29.04          |
| IS-3  | 1    | 30.12          |
|       | 2    | 26.10          |
| IS-4  | 1    | 33.82          |
|       | 2    | 24.51          |
| IS-5  | 1    | 27.01          |
|       | 2    | 32.62          |
| IS-6  | 1    | 25.33          |
|       | 2    | 30.40          |
| IS-7  | 1    | 30.92          |
|       | 2    | 25.31          |
| IS-8  | 1    | 30.73          |
|       | 2    | 26.26          |
| IS-9  | 1    | 26.78          |
|       | 2    | 29.46          |
| IS-10 | 1    | 30.48          |
|       | 2    | 25.19          |
| IS-11 | 1    | 29.53          |
|       | 2    | 27.38          |
| IS-12 | 1    | 27.40          |
|       | 2    | 30.61          |
| IS-13 | 1    | 27.09          |
|       | 2    | 29.82          |
| IS-14 | 1    | 29.69          |
|       | 2    | 32.31          |
| IS-15 | 1    | 32.72          |
|       | 2    | 30.84          |
| IS-16 | 1    | 32.59          |
|       | 2    | 30.56          |

|             |                   |
|-------------|-------------------|
| Mean and SD | 29.<br>1 ±<br>2.6 |
|-------------|-------------------|
